# Supplementary material for: Protogenin facilitates trunk-to-tail HOX code transition via modulating GDF11/SMAD2 signaling in mammalian embryos
Source: PubMed Central journal article supplement — Commun Biol. 2024 Dec 19;7:1669. doi: 10.1038/s42003-024-07342-8 (PMC11659552; doi:10.1038/s42003-024-07342-8), 2024-12-19
Supplement: 42003_2024_7342_MOESM2_ESM.pdf [file 42003_2024_7342_MOESM2_ESM.pdf]

## Description of Additional Supplementary Files

File name: Supplementary Data 1

Description: List of differentially expressed genes in the posterior trunk of Prtg<sup>-/-</sup> embryos

File name: Supplementary Data 2

Description: Sequences constructed and generated in this study

File name: Supplementary Data 3

Description: Source data underlying the graphs and charts in the main figures

File name: Supplementary Movie 1

Description: Whole-mount immunostaining of Prtg and pSmad2 in E9.5 control embryo

File name: Supplementary Movie 2

Description: Whole-mount immunostaining of Prtg and pSmad2 in E9.5 Prtg<sup>-/-</sup> embryo

File name: Supplementary Movie 3

Description: Whole-mount immunostaining of Hoxc10 in E9.5 control embryo

File name: Supplementary Movie 4

Description: Whole-mount immunostaining of Hoxc10 in E9.5 Prtg<sup>-/-</sup> embryo
