# Supplementary material for: Protogenin facilitates trunk-to-tail HOX code transition via modulating GDF11/SMAD2 signaling in mammalian embryos
Source: PubMed Central journal article supplement — Commun Biol. 2024 Dec 19;7:1669. doi: 10.1038/s42003-024-07342-8 (PMC11659552; doi:10.1038/s42003-024-07342-8), 2024-12-19
Supplement: 42003_2024_7342_MOESM10_ESM.pdf [file 42003_2024_7342_MOESM10_ESM.pdf]

## Reporting Summary

Nature Portfolio wishes to improve the reproducibility of the work that we publish. This form provides structure for consistency and transparency in reporting. For further information on Nature Portfolio policies, see our [Editorial Policies](#) and the [Editorial Policy Checklist](#).

### Statistics

For all statistical analyses, confirm that the following items are present in the figure legend, table legend, main text, or Methods section.

n/a Confirmed

- The exact sample size ( $n$ ) for each experimental group/condition, given as a discrete number and unit of measurement
- A statement on whether measurements were taken from distinct samples or whether the same sample was measured repeatedly
- The statistical test(s) used AND whether they are one- or two-sided  
*Only common tests should be described solely by name; describe more complex techniques in the Methods section.*
- A description of all covariates tested
- A description of any assumptions or corrections, such as tests of normality and adjustment for multiple comparisons
- A full description of the statistical parameters including central tendency (e.g. means) or other basic estimates (e.g. regression coefficient) AND variation (e.g. standard deviation) or associated estimates of uncertainty (e.g. confidence intervals)
- For null hypothesis testing, the test statistic (e.g.  $F$ ,  $t$ ,  $r$ ) with confidence intervals, effect sizes, degrees of freedom and  $P$  value noted  
*Give  $P$  values as exact values whenever suitable.*
- For Bayesian analysis, information on the choice of priors and Markov chain Monte Carlo settings
- For hierarchical and complex designs, identification of the appropriate level for tests and full reporting of outcomes
- Estimates of effect sizes (e.g. Cohen's  $d$ , Pearson's  $r$ ), indicating how they were calculated

*Our web collection on [statistics for biologists](#) contains articles on many of the points above.*

### Software and code

Policy information about [availability of computer code](#)

Data collection Cutadapt (V1.9.1), Hisat2 (v2.0.1) and HT-seq (V 0.6.1) were used to process RNA-seq data.

Data analysis EdgeR (V3.24.1) and Gene Set Enrichment Analysis (GSEA, v4.2.3) were used to analyze RNA-seq data.

For manuscripts utilizing custom algorithms or software that are central to the research but not yet described in published literature, software must be made available to editors and reviewers. We strongly encourage code deposition in a community repository (e.g. GitHub). See the Nature Portfolio [guidelines for submitting code & software](#) for further information.

### Data

Policy information about [availability of data](#)

All manuscripts must include a [data availability statement](#). This statement should provide the following information, where applicable:

- Accession codes, unique identifiers, or web links for publicly available datasets
- A description of any restrictions on data availability
- For clinical datasets or third party data, please ensure that the statement adheres to our [policy](#)

RNA-sequencing data have been deposited at NCBI database with accession number GSE256393 and are publicly available as of the date of publication. Link: <https://www.ncbi.nlm.nih.gov/geo/query/acc.cgi?acc=GSE256393>

## Human research participants

Policy information about [studies involving human research participants and Sex and Gender in Research](#).

|                             |                                                                                                  |
|-----------------------------|--------------------------------------------------------------------------------------------------|
| Reporting on sex and gender | <input checked="" type="checkbox"/> The study does not contain human participants or human data. |
| Population characteristics  | <input checked="" type="checkbox"/> The study does not contain human participants or human data. |
| Recruitment                 | <input checked="" type="checkbox"/> The study does not contain human participants or human data. |
| Ethics oversight            | <input checked="" type="checkbox"/> The study does not contain human participants or human data. |

Note that full information on the approval of the study protocol must also be provided in the manuscript.

## Field-specific reporting

Please select the one below that is the best fit for your research. If you are not sure, read the appropriate sections before making your selection.

Life sciences  Behavioural & social sciences  Ecological, evolutionary & environmental sciences

For a reference copy of the document with all sections, see [nature.com/documents/nr-reporting-summary-flat.pdf](https://www.nature.com/documents/nr-reporting-summary-flat.pdf)

## Life sciences study design

All studies must disclose on these points even when the disclosure is negative.

|                 |                                                                                                                                                                                      |
|-----------------|--------------------------------------------------------------------------------------------------------------------------------------------------------------------------------------|
| Sample size     | <input checked="" type="checkbox"/> We did not perform statistical methods to predetermine sample-size. For statistic calculation, our data are from at least 2 independent samples. |
| Data exclusions | <input checked="" type="checkbox"/> No data exclusion in this study.                                                                                                                 |
| Replication     | <input checked="" type="checkbox"/> At least 2 replication was used for each assay.                                                                                                  |
| Randomization   | <input checked="" type="checkbox"/> We included all the samples we collected for analysis.                                                                                           |
| Blinding        | <input checked="" type="checkbox"/> The study does not require blinding.                                                                                                             |

## Reporting for specific materials, systems and methods

We require information from authors about some types of materials, experimental systems and methods used in many studies. Here, indicate whether each material, system or method listed is relevant to your study. If you are not sure if a list item applies to your research, read the appropriate section before selecting a response.

### Materials & experimental systems

| n/a                                 | Involved in the study                                           |
|-------------------------------------|-----------------------------------------------------------------|
| <input type="checkbox"/>            | <input checked="" type="checkbox"/> Antibodies                  |
| <input type="checkbox"/>            | <input checked="" type="checkbox"/> Eukaryotic cell lines       |
| <input checked="" type="checkbox"/> | <input type="checkbox"/> Palaeontology and archaeology          |
| <input type="checkbox"/>            | <input checked="" type="checkbox"/> Animals and other organisms |
| <input checked="" type="checkbox"/> | <input type="checkbox"/> Clinical data                          |
| <input checked="" type="checkbox"/> | <input type="checkbox"/> Dual use research of concern           |

### Methods

| n/a                                 | Involved in the study                              |
|-------------------------------------|----------------------------------------------------|
| <input checked="" type="checkbox"/> | <input type="checkbox"/> ChIP-seq                  |
| <input type="checkbox"/>            | <input checked="" type="checkbox"/> Flow cytometry |
| <input checked="" type="checkbox"/> | <input type="checkbox"/> MRI-based neuroimaging    |

## Antibodies

|                 |                                                                                                                                                                                                                                                                                                                                                                                                                                                                                                                                                                                                                                                                               |
|-----------------|-------------------------------------------------------------------------------------------------------------------------------------------------------------------------------------------------------------------------------------------------------------------------------------------------------------------------------------------------------------------------------------------------------------------------------------------------------------------------------------------------------------------------------------------------------------------------------------------------------------------------------------------------------------------------------|
| Antibodies used | <p>Mouse monoclonal anti-Prtg [1D5], homemade, doi: 10.1523/JNEUROSCI.0473-10.2010</p> <p>Mouse monoclonal anti-Prtg [2B3], GeneTex Cat# GTX83789; RRID: AB_10731789</p> <p>Mouse monoclonal anti-Prtg [OT12B3], OriGene Cat# TA501394; RRID: AB_11126435</p> <p>Rabbit monoclonal anti-pSmad2 (Ser465/Ser467), Cell Signaling Technology Cat# 18338; RRID: AB_2798798</p> <p>Rabbit polyclonal anti-pSmad2 (phospho Ser465/Ser467), GeneTex Cat# GTX133614; RRID: AB_2887051</p> <p>Mouse monoclonal anti-Smad2/3, Santa Cruz Biotechnology Cat# sc-133098; RRID: AB_2193048</p> <p>Rabbit monoclonal anti-Smad2, Cell Signaling Technology Cat# 5339; RRID: AB_10626777</p> |
|-----------------|-------------------------------------------------------------------------------------------------------------------------------------------------------------------------------------------------------------------------------------------------------------------------------------------------------------------------------------------------------------------------------------------------------------------------------------------------------------------------------------------------------------------------------------------------------------------------------------------------------------------------------------------------------------------------------|

Rabbit monoclonal anti-Smad4, Cell Signaling Technology Cat# 38454; RRID: AB\_2728776  
 Rabbit polyclonal anti-HOXC10, GeneTex Cat# GTX118025; RRID: AB\_11170594  
 Rabbit polyclonal anti-Oct4, GeneTex Cat# GTX101497; RRID: AB\_10618784  
 Rabbit monoclonal anti-GDF11, Abcam Cat# ab124721; RRID: AB\_10974143  
 Rabbit polyclonal anti-Flag tag, Sigma-Aldrich Cat# F7425; RRID: AB\_439687  
 Rabbit polyclonal anti-HA tag, Proteintech Cat# 51064-2-AP; RRID: AB\_11042321  
 Sheep polyclonal anti-Prtg, R&D Systems Cat# AF4919; RRID: AB\_2172305  
 Goat polyclonal anti-TBX6, R&D Systems Cat# AF4744; RRID: AB\_2200834  
 Mouse monoclonal anti-GAPDH, Thermo Fisher Scientific Cat# AM4300; RRID: AB\_2536381  
 Rabbit monoclonal anti-pSmad2 (phospho S467), Abcam Cat# ab280888  
 Goat Anti-Mouse IgG Polyclonal antibody, Horseradish peroxidase Conjugated, Millipore Cat# AP124P; RRID: AB\_90456  
 Goat anti-Rabbit IgG (H+L) Secondary Antibody, HRP, Thermo Fisher Scientific Cat# 31460; RRID: AB\_228341  
 F(ab')<sub>2</sub>-Goat anti-Rabbit IgG (H+L) Cross-Adsorbed Secondary Antibody, Alexa Fluor Plus 647, Invitrogen Cat# A48285; RRID: AB\_2896349  
 Donkey anti-Sheep IgG (H+L) Cross-Adsorbed Secondary Antibody, Alexa Fluor 555, Invitrogen Cat# A21436; RRID: AB\_2535857  
 Donkey anti-Rabbit IgG (H+L) Highly Cross-Adsorbed Secondary Antibody, Alexa Fluor 647, Invitrogen Cat# A31573; RRID: AB\_2536183  
 Donkey anti-Goat IgG (H+L) Cross-Adsorbed Secondary Antibody, Alexa Fluor™ 555, Invitrogen Cat# A21432; RRID: AB\_2535853

## Validation

All primary antibodies were validated by immunoblotting or immunofluorescence to ensure their specificity.

## Eukaryotic cell lines

Policy information about [cell lines and Sex and Gender in Research](#)

## Cell line source(s)

The hiPSC line, NTUH-iPSC-02-02 (abbreviated to N2), was purchased from Bioresource Collection and Research Center of Food Industry Research and Development Institute, Taiwan.  
 P19 embryonic carcinoma cells were purchased from Bioresource Collection and Research Center of Food Industry Research and Development Institute, Taiwan (BCRC Number: 60052).

## Authentication

The N2 hiPSCs were stained with stem cell markers and alkaline phosphatase activity to ensure its pluripotency.  
 P19 embryonic carcinoma cells were not authenticated.

## Mycoplasma contamination

Mycoplasma contamination was not tested.

Commonly misidentified lines  
(See [ICLAC](#) register)

No commonly misidentified lines found.

## Animals and other research organisms

Policy information about [studies involving animals](#); [ARRIVE guidelines](#) recommended for reporting animal research, and [Sex and Gender in Research](#)

## Laboratory animals

Transgene mouse C57BL/6

## Wild animals

The study did not involve wild animals.

## Reporting on sex

Sex was not considered in this study. The phenotype is not sex-based.

## Field-collected samples

The study did not involve samples collected from the field.

## Ethics oversight

All procedures involving mice were conducted in strict accordance with the university guidelines. Ethical approval for animal experiments was obtained from the Institutional Animal Care and Use Committee of National Yang Ming Chiao Tung University.

Note that full information on the approval of the study protocol must also be provided in the manuscript.

## Flow Cytometry

### Plots

Confirm that:

- The axis labels state the marker and fluorochrome used (e.g. CD4-FITC).
- The axis scales are clearly visible. Include numbers along axes only for bottom left plot of group (a 'group' is an analysis of identical markers).
- All plots are contour plots with outliers or pseudocolor plots.
- A numerical value for number of cells or percentage (with statistics) is provided.

### Methodology

## Sample preparation

Day 5 iPSC-PSM cells were rinsed with PBS and detached with TrypLE Express. The TrypLE enzyme was inactivated by diluted

Sample preparation

with PBS containing 3% BAS and removed by centrifugation. The concentration of cells was adjusted to  $1 \times 10^6$  cells/mL and 1 mL of cells was used for each assay. Cells were fixed with 4% PFA/PBS on ice for 15 minutes, followed by washing with TBST for two times and resuspended in 100  $\mu$ L TBST. Permeabilization was performed by adding 900  $\mu$ L prechilled 100% methanol to reach a concentration of 90% methanol and incubate at  $-20^\circ\text{C}$  for 10 minutes. Cells were stored at  $-20^\circ\text{C}$  before immunostaining. Immunostaining of cells was performed by pelleting and washed twice with TBST to remove methanol, followed by blocking in TBST containing 10% horse serum for 30 minutes at room temperature. Primary antibody was added directly to the solution after blocking and incubated for 45 minutes at room temperature. Cells were rinsed twice with TBST to remove unbound antibodies and then incubated with TBST containing 10% horse serum and secondary antibody for 45 minutes at room temperature. After immunostaining, cells were rinsed twice with TBST, resuspended in PBS and transferred into a test tube with cell strainer.

Instrument

Beckman CytoFLEX S (model no. B75442)

Software

CytExpert v 2.4

Cell population abundance

iPSC-PSM cell population was determined by TBX6 staining.

Gating strategy

Cell debris and clumps of multiple cells were removed by gating with FSC-A and SSC-A. iPSC-PSM cell population was determined by gating the fluorescence intensity of TBX6 staining.

Tick this box to confirm that a figure exemplifying the gating strategy is provided in the Supplementary Information.
